# Supplementary material for: Analysis of Hypoxia and Hypoxia-Like States through Metabolite Profiling
Source: PubMed Central journal article supplement (PMC3171472; doi:10.1371/journal.pone.0024741), 2011-09-12

Supplementary Figure 1: Cobalt effects on the ergosterol pathway in cells grown in enriched YPD medium

A

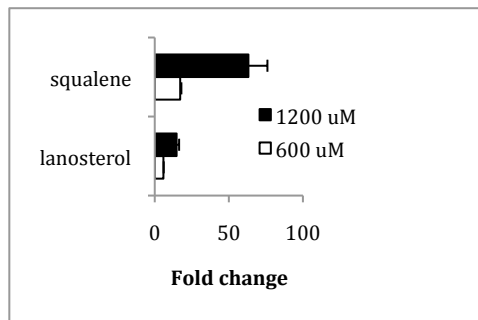

B

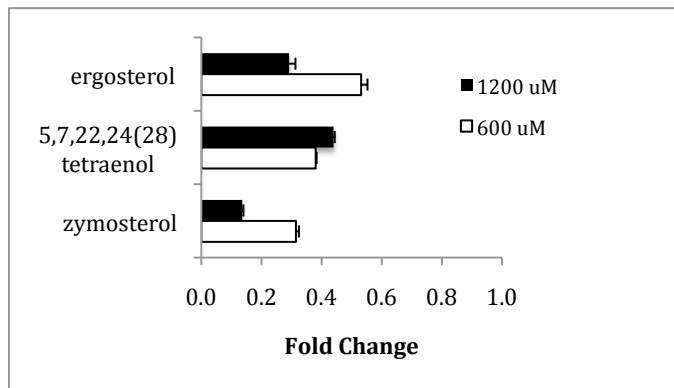

C

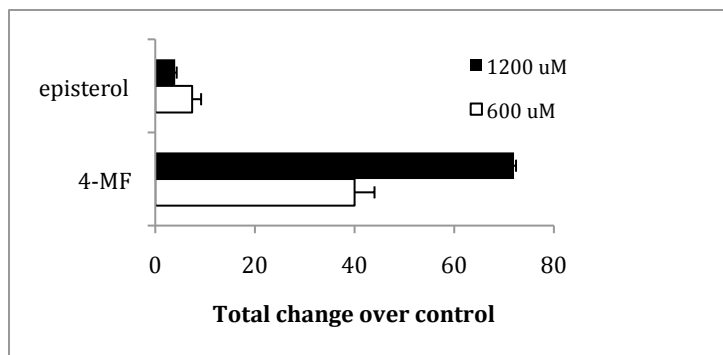

Supplement: pone.0024741.s001.pdf [file pone.0024741.s001.pdf]
