# Supplementary material for: Analysis of Hypoxia and Hypoxia-Like States through Metabolite Profiling
Source: PubMed Central journal article supplement (PMC3171472; doi:10.1371/journal.pone.0024741), 2011-09-12

Supplementary Figure 3: Cobalt treatment does not result in an apparent cell cycle defect.

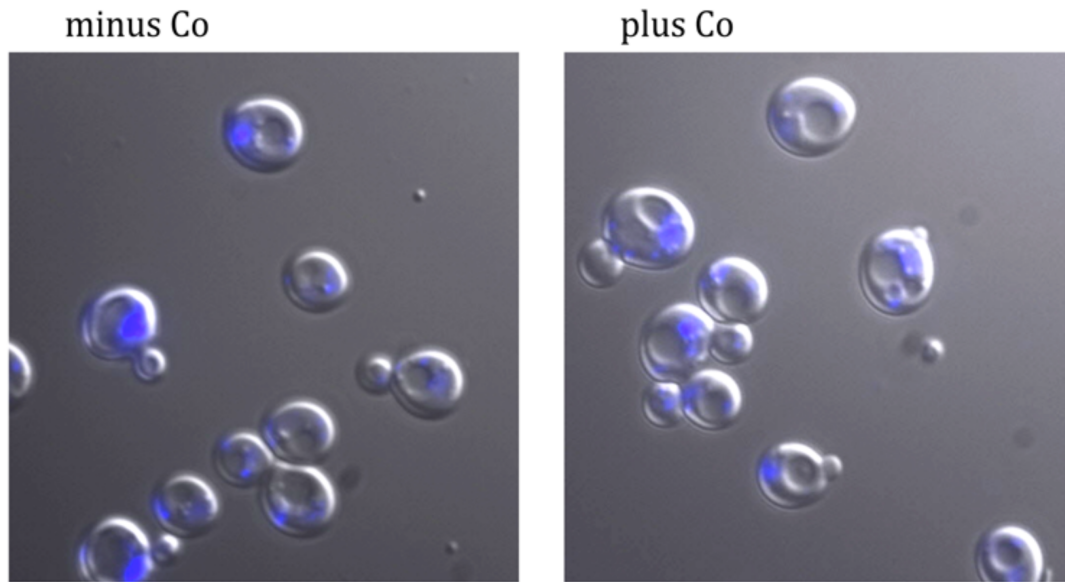

Supplement: pone.0024741.s003.pdf [file pone.0024741.s003.pdf]
