# Supplementary material for: Analysis of Hypoxia and Hypoxia-Like States through Metabolite Profiling
Source: PubMed Central journal article supplement (PMC3171472; doi:10.1371/journal.pone.0024741), 2011-09-12

Supplementary Figure 4:  
Hypoxia does not induce levels of Aro3p and Aro4p for biosynthesis of phenylalanine and tyrosine

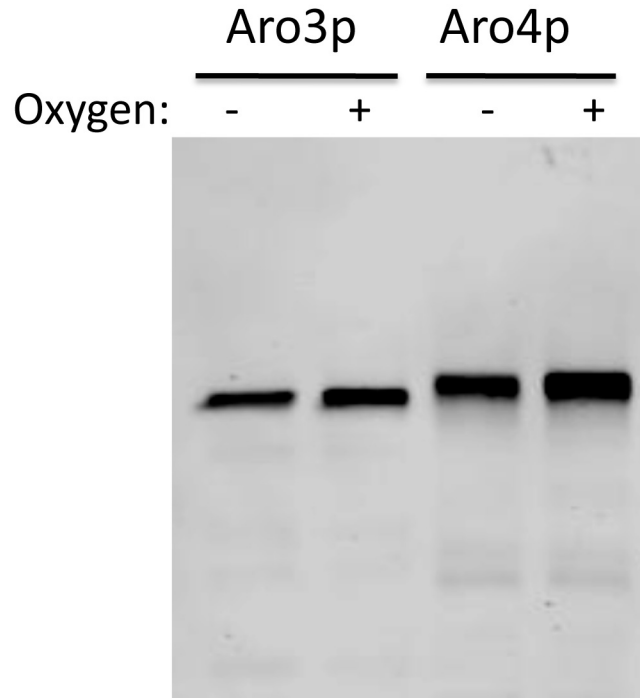

Supplement: pone.0024741.s004.pdf [file pone.0024741.s004.pdf]
