# Supplementary material for: Analysis of Hypoxia and Hypoxia-Like States through Metabolite Profiling
Source: PLoS One. 2011 Sep 12;6(9):e24741. doi: 10.1371/journal.pone.0024741 (PMC3171472; doi:10.1371/journal.pone.0024741)
Supplement: Table S1 — Metabolite profiles for yeast grown in the absence of oxygen or the presence of cobalt. Cells were grown and prepared for analysis by GC/MS as described in Materials and Methods. Shown are the composite list of metabolites analyzed. In two independent experimental trials, the fold change of 8 individual treated (hypoxia or cobalt) over 8 individual control untreated was calculated, with P values as determined in a T-test. The means calculated over the two experimental trials with standard deviation is shown. Numbers in black reflect statistically significant values where the P values for both experimental trials were <0.05. (XLS) [file pone.0024741.s005.xls]

## Sheet: Summary 
Supplementary Table: Metabolite profiles for yeast grown in the absence of oxygen or the presence of cobalt.
	Trial 1		Trial 2				Trial 1		Trial 2
	Control versus hypoxia		Control versus hypoxia		Mean		Control versus 2 mM Cobalt		Control versus 2 mM Cobalt		Mean
	T-test		T-test		Control versus Anoxia		T-test		T-test		Control versus 2 mM Cobalt
	p-Value	Fold Change	p-Value	Fold Change	Fold Change	Std. Dev.	p-Value	Fold Change	p-Value	Fold Change	Fold Change	Std. Dev.
lactate	0.00834065	1.44628	0.594302	1.06584	1.25606	0.269013	0.0327601	0.770852	0.0872001	0.823966	0.797409	0.0375572
citrate	3.85762e-06	2.02649	7.57152e-07	2.68432	2.35541	0.46515	3.69989e-08	8.10149	6.17745e-13	12.3792	10.2403	3.02479
isocitrate	0.00633195	1.59363	0.00493079	2.71035	2.15199	0.789636	0.000151956	1.83188	0.00190524	3.43815	2.63501	1.13581
succinate	4.40516e-08	5.06289	2.3847e-06	3.79807	4.43048	0.894366	0.321118	1.06261	0.0365406	1.11646	1.08953	0.0380799
fumarate	0.052117	0.743192	0.0160046	0.6198	0.681496	0.087251	0.998528	0.999778	0.295754	1.15536	1.07757	0.11001
malate	6.24691e-06	0.596664	9.10836e-05	0.538194	0.567429	0.0413451	6.44577e-05	0.720354	0.43222	0.933846	0.8271	0.150962
homocitrate	1.68881e-10	0.246056	0.00220503	0.597414	0.421735	0.248447	5.51871e-08	5.99321	3.2367e-10	11.1149	8.55406	3.62159
2-aminoadipic acid	7.67271e-08	0.0518601	4.14675e-07	0.0775766	0.0647183	0.0181844	0.000390865	1.43387	0.00278529	0.597356	1.01561	0.591502
lysine	0.018	0.443	0.0011938	0.319195	0.381098	0.087543	0.229	0.597	0.000757562	0.306191	0.451596	0.205633
valine	0.000241349	2.04275	6.59023e-06	2.16858	2.10567	0.0889752	4.42815e-06	1.49368	0.00117863	1.41315	1.45342	0.056937
leucine	0.000305824	0.0118081	1.0977e-08	0.00792166	0.00986489	0.00274813	0.374389	1.18793	0.000222142	0.516584	0.852259	0.474716
2-isopropylmalate	1.5167e-13	52.1526	9.84303e-08	54.8445	53.4986	1.90343	0.154829	0.724006	0.497648	1.12245	0.923227	0.281741
3-isopropylmalate	1.11642e-09	36.0014	2.75498e-06	39.9975	37.9995	2.82565	1.20587e-05	0.739917	0.754073	0.962609	0.851263	0.157467
isoleucine	0.131561	1.18786	0.0261242	1.27965	1.23375	0.0649089	0.0268098	1.08371	0.128495	1.13978	1.11174	0.0396454
4-methyl-2-isovaleric acid	0.853444	0.98259	0.47324	0.901629	0.94211	0.0572484	0.0937822	1.25383	0.0030437	1.34471	1.29927	0.0642624
threonine	0.426972	1.13186	0.0715233	1.28305	1.20746	0.106904	0.555209	0.914848	0.131808	0.815604	0.865226	0.0701764
homoserine	0.0107199	3.14018	0.00353948	2.72789	2.93403	0.291527	1.47375e-06	4.1857	0.0585654	1.71241	2.94906	1.74888
glycine	0.676013	0.942508	0.212885	0.90636	0.924434	0.0255606	0.00460336	1.155	0.456937	0.954735	1.05487	0.141611
serine	0.0325093	1.42959	0.0506403	1.30448	1.36703	0.0884663	0.0653732	0.693105	0.00273526	0.58949	0.641297	0.0732671
alanine	2.8768e-05	5.78187	2.26189e-06	4.55899	5.17043	0.864711	0.00030378	1.5995	0.0042081	1.44859	1.52405	0.106705
glutamate	0.399897	1.1276	0.336774	1.08313	1.10537	0.031439	0.248251	1.12705	0.192724	0.901693	1.01437	0.159351
glutamine	3.50381e-06	2.22339	0.00015231	2.49516	2.35928	0.192172	0.362341	1.04343	0.0588517	1.1988	1.12111	0.10986
proline	0.0470419	0.631909	0.000247893	0.387783	0.509846	0.172623	0.637996	0.915244	0.00711111	0.646979	0.781111	0.189691
aspartate	0.00409071	2.00728	0.0216415	2.03069	2.01899	0.0165569	0.00435799	1.3195	0.70434	1.04823	1.18386	0.191815
asparagine	3.4006e-05	3.24038	0.00153658	2.7802	3.01029	0.325401	0.0105407	1.73712	0.0753167	1.32828	1.5327	0.289098
phenylalanine	0.0109799	2.44116	3.46059e-06	3.51846	2.97981	0.761769	0.0153088	1.2058	0.325483	0.847586	1.02669	0.253295
tyrosine	0.000102782	6.98872	2.40739e-06	10.2759	8.63229	2.32437	0.000670184	2.09183	0.169849	1.37358	1.7327	0.507882
ornithine	0.000127399	0.0228139	4.06725e-07	0.0166386	0.0197263	0.00436659	0.0098324	1.43246	0.138367	0.808	1.12023	0.441562
phosphoglycerol	6.69626e-05	0.456725	0.0458428	0.765201	0.610963	0.218126	2.34753e-06	0.45692	0.420242	0.935986	0.696453	0.33875
2/3-phosphoglycerate	0.0029526	0.81431	0.000630027	0.437008	0.625659	0.266793	8.904e-06	0.566595	4.46339e-05	0.28679	0.426692	0.197852
glucose-1-phosphate	5.97296e-08	12.4037	4.14411e-06	7.80562	10.1047	3.25134	1.40917e-07	4.30788	7.93149e-07	4.74878	4.52833	0.311765
glucose-6-phosphate	4.3076e-06	18.6572	3.48037e-06	9.58419	14.1207	6.41561	6.74557e-09	6.31415	5.46333e-06	6.151	6.23258	0.115362
inositol	0.000111974	1.51806	0.0440291	1.13229	1.32517	0.272779	0.0831402	1.10258	0.00220518	0.74153	0.922054	0.255299
ergosta-5,7,9(11),-22-tetraen-3B-ol	0.00012052	0.529675	0.022381	0.796596	0.663135	0.188742	0.00045248	0.557116	0.41574	1.08746	0.822288	0.375009
zymosterol	1.38228e-06	1.55955	0.000883971	2.30804	1.93379	0.529263	2.03287e-09	0.057517	6.60636e-08	0.0966101	0.0770635	0.027643
ergosterol	1.97118e-10	0.0762812	9.91171e-12	0.113405	0.0948433	0.0262508	1.44841e-07	0.38235	2.1863e-09	0.399955	0.391152	0.012448
ergosta-5,7,22,24(28)-tetraen-3B-ol	5.32102e-08	0.169702	4.32874e-05	0.26213	0.215916	0.0653567	6.50728e-07	0.53035	0.00109055	0.506455	0.518403	0.016896
fecosterol	0.0576219	0.747252	0.0841582	0.656004	0.701628	0.0645222	5.97727e-05	0.26825	0.000110333	0.375228	0.321739	0.0756449
ergosta-5,7-dienol	8.44175e-08	2.93706	9.50604e-05	5.09926	4.01816	1.52891	5.25169e-09	0.181215	1.24353e-07	0.251687	0.216451	0.0498314
episterol	1.50499e-07	0.258262	1.74142e-05	0.42244	0.340351	0.116091	1.61781e-08	0.257646	5.53287e-10	0.264469	0.261058	0.00482443
4-methylzymosterol	0.0939257	0.928225	0.344978	0.930136	0.929181	0.00135099	0.0185376	0.875361	0.038197	0.878797	0.877079	0.00242961
ergosta-7-en-3B-ol	4.43571e-06	2.09694	0.464382	0.920285	1.50861	0.83202	6.79123e-10	3.1651	1.36414e-05	1.59305	2.37907	1.11161
lanosterol	1.92124e-07	2.52905	0.000534041	3.65815	3.0936	0.798393	2.72945e-09	4.17726	1.35973e-05	3.49038	3.83382	0.485698
4,4-dimethylzymosterolND	0.046258	1.16704	0.0025773	1.84717	1.50711	0.480928	1.1007e-11	50.1875	3.55443e-10	36.4034	43.2955	9.74677
adenosine	0.00663046	0.249649	0.00321284	0.290371	0.27001	0.0287954	0.0824435	0.648952	0.0195633	0.414233	0.531592	0.165972
orotate	0.0323862	1.25313	0.041197	1.33508	1.2941	0.0579477	0.000548901	0.666393	0.780866	1.04646	0.856428	0.26875
uracil	0.000567639	1.73854	0.158107	0.861884	1.30021	0.619891	0.231484	1.13503	3.04391e-05	0.633846	0.884436	0.354387
ribose	0.00573266	0.825078	0.00189052	0.670093	0.747586	0.109591	0.287873	1.03935	0.658946	0.973089	1.00622	0.046852
trehalose	9.09878e-07	1.50591	4.70893e-05	1.55923	1.53257	0.0376982	1.32291e-06	0.790518	0.00167879	0.838111	0.814315	0.0336532
mevalonic acid	8.15448e-06	0.292455	0.00569266	0.70939	0.500923	0.294817	2.29072e-05	0.36916	0.0837032	0.877363	0.623261	0.359353
myo-inositol phosphate	0.000718743	0.700937	5.32543e-08	0.164205	0.432571	0.379527	7.84275e-05	0.7285	0.000206819	0.57764	0.65307	0.106674
glyceric acid	1.26961e-06	0.267979	0.00137705	0.400836	0.334408	0.0939442	1.73217e-07	0.566499	0.00629459	0.578213	0.572356	0.00828289
These data represent the designated paired comparisons and correspond to the fold-change in the mean values for the indicated metabolites.
The mean fold change and standard deviation for anoxic or cobalt exposed samples are also shown.
Values shown in gray were not statistically significant in either one or both trials, Student's t-test p < 0.05. Values shown in black were statistically significant in both trials, Student's t-test p < 0.05.
